# Supplementary material
Source: Springer Nature journal article supplement (https://www.springermedizin.de/resource/supplementary/12990_2013_596_MOESM7_ESM.pdf/9613586)

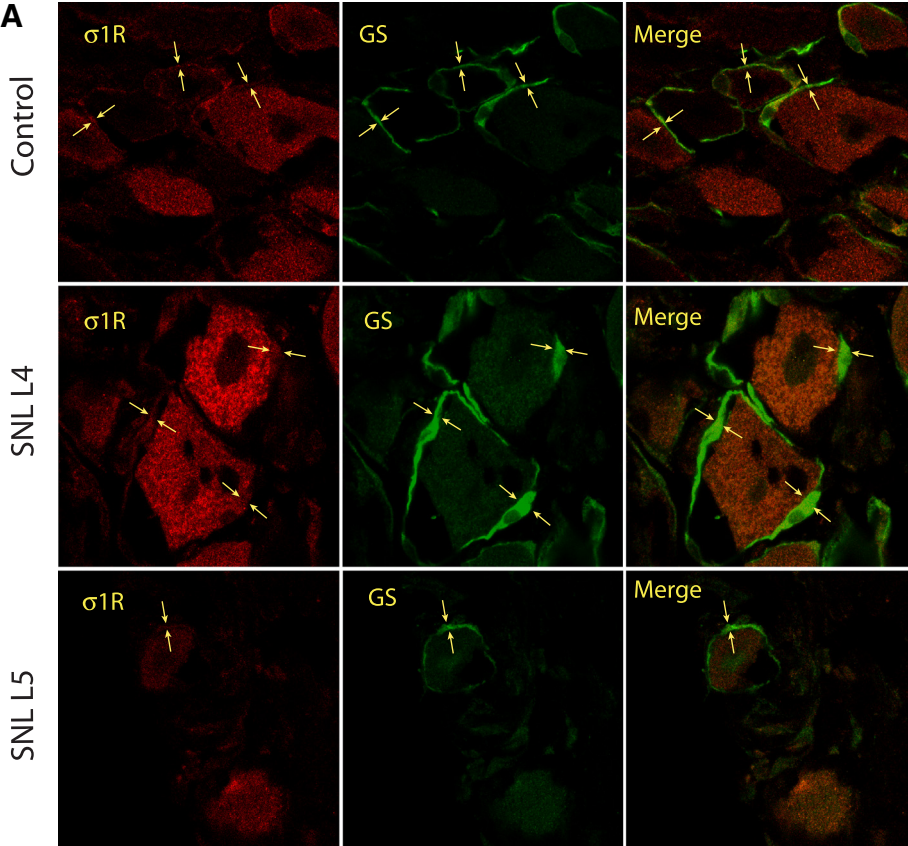

**B**

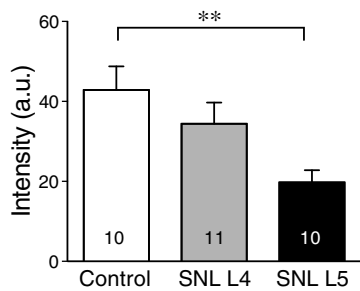

Supplement: MOESM7 [file 9613586]
